# Supplementary material
Source: PubMed Central journal article supplement (PMC7842136)
Supplement: sc0c06181_si_001.pdf [file sc0c06181_si_001.pdf]

## Supporting Information

### **Catalytic conversion of free fatty acids to bio-based aromatics: A model investigation using oleic acid and an H-ZSM-5/Al<sub>2</sub>O<sub>3</sub> catalyst**

Songbo He<sup>†</sup>, Frederike Gerda Hiltje Klein<sup>†</sup>, Thomas Sjouke Kramer<sup>†</sup>, Anshu Chandel<sup>†</sup>, Zhuorigebatu Tegudeer<sup>†</sup>,  
Andre Heeres<sup>‡</sup> and Hero Jan Heeres<sup>†,\*</sup>

<sup>†</sup>Green Chemical Reaction Engineering, Engineering and Technology Institute Groningen, University of Groningen,  
Nijenborgh 4, 9747 AG Groningen, The Netherlands

<sup>‡</sup>Hanze University of Applied Sciences, Zernikeplein 11, 9747 AS Groningen, The Netherlands

\*Corresponding author. E-mail: [h.j.heeres@rug.nl](mailto:h.j.heeres@rug.nl).

Number of Pages: 16

Number of Figures: 11

Number of Tables: 1

## Contents

|                                                                                                                                                                                                |    |
|------------------------------------------------------------------------------------------------------------------------------------------------------------------------------------------------|----|
| Fig. S1. Pricing for benzene, toluene and mixed xylene in the past three years.....                                                                                                            | 3  |
| Fig. S2. Mass balance for catalytic conversion of oleic acid over fresh H-ZSM-5/Al <sub>2</sub> O <sub>3</sub> catalyst. ....                                                                  | 4  |
| Fig. S3. Carbon yields of gaseous products <i>versus</i> TOS over fresh H-ZSM-5/Al <sub>2</sub> O <sub>3</sub> catalysts. ....                                                                 | 5  |
| Fig. S4. Carbon yields of aromatics (top) and selectivity's of the individual BTX (bottom) <i>versus</i> TOS over fresh and regenerated H-ZSM-5/Al <sub>2</sub> O <sub>3</sub> catalysts. .... | 6  |
| Fig. S5. TEM image and elemental (Al and Si) maps of the fresh H-ZSM-5/Al <sub>2</sub> O <sub>3</sub> catalyst.....                                                                            | 7  |
| Fig. S6. Quantitative EDX analysis of Fresh catalyst. ....                                                                                                                                     | 8  |
| Fig. S7. NH <sub>3</sub> -TPD profiles of fresh, used and regenerated H-ZSM-5/Al <sub>2</sub> O <sub>3</sub> catalysts. ....                                                                   | 9  |
| Fig. S8. Elemental (Al, Si and C) maps of the used and regenerated H-ZSM-5/Al <sub>2</sub> O <sub>3</sub> catalysts.....                                                                       | 10 |
| Fig. S9. Elemental (Al, Si and C) maps of Used-1 catalyst.....                                                                                                                                 | 11 |
| Fig. S10. Elemental (Al, Si and C) maps of Used-7 catalyst.....                                                                                                                                | 12 |
| Scheme S1. Proposed reaction pathways for conversion of oleic acid to aromatics. ....                                                                                                          | 13 |
| Table S1 GC-MS analysis of the liquid product from thermal pyrolysis of oleic acid .....                                                                                                       | 14 |
| References .....                                                                                                                                                                               | 16 |

Prices are collected from the weekly report of Ethanol Market and Pricing Data by U.S. Grains Council.  
The reports are available at [https://grains.org/ethanol\\_report/](https://grains.org/ethanol_report/)

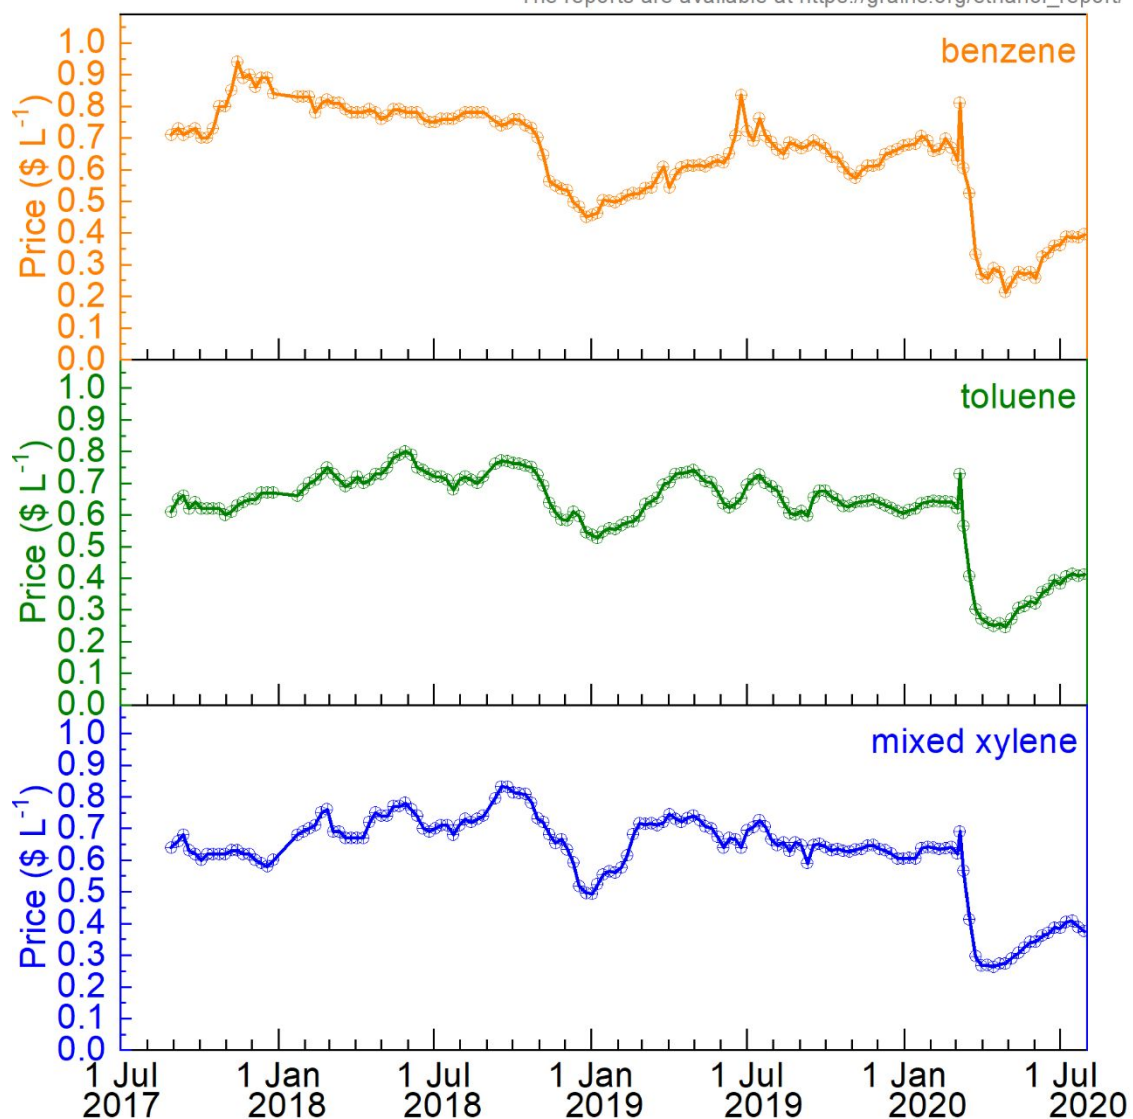

Fig. S1. Pricing for benzene, toluene, and mixed xylene in the past three years (1 July 2017 - 31 July 2020).

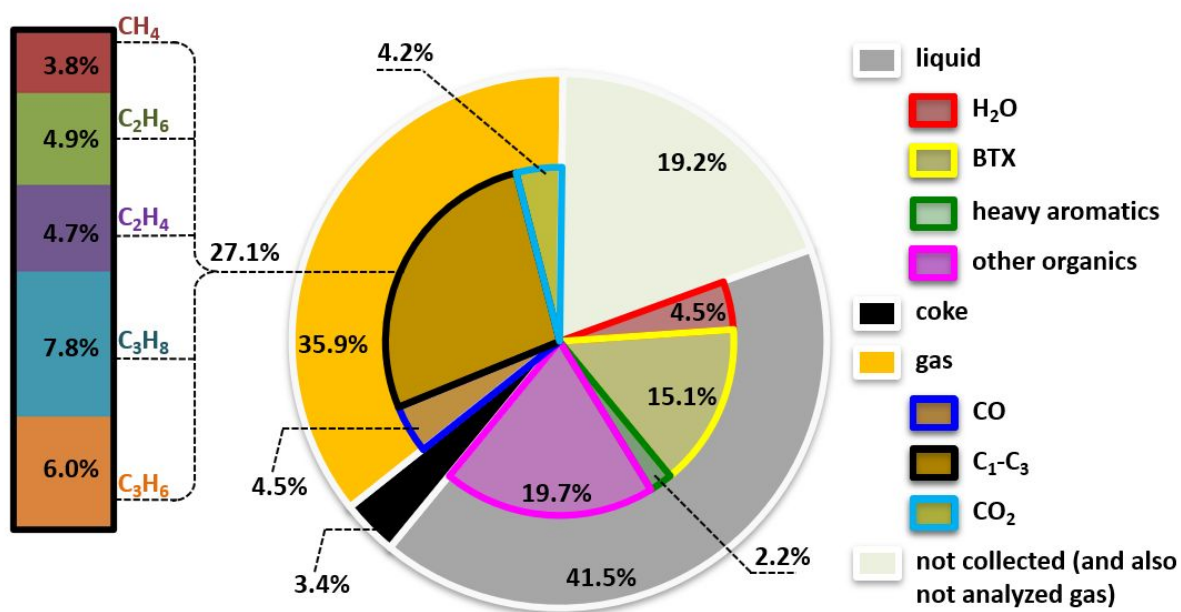

Fig. S2. Mass balance for catalytic conversion of oleic acid over fresh H-ZSM-5/Al<sub>2</sub>O<sub>3</sub> catalyst. (Reaction conditions: catalyst particle size of 1.2 - 1.8 mm, catalyst loading of 10 g, catalyst bed temperature of 550 °C, atmospheric pressure, N<sub>2</sub> flow of 50 ml min<sup>-1</sup>, and WHSV of oleic acid of 1 h<sup>-1</sup>.)

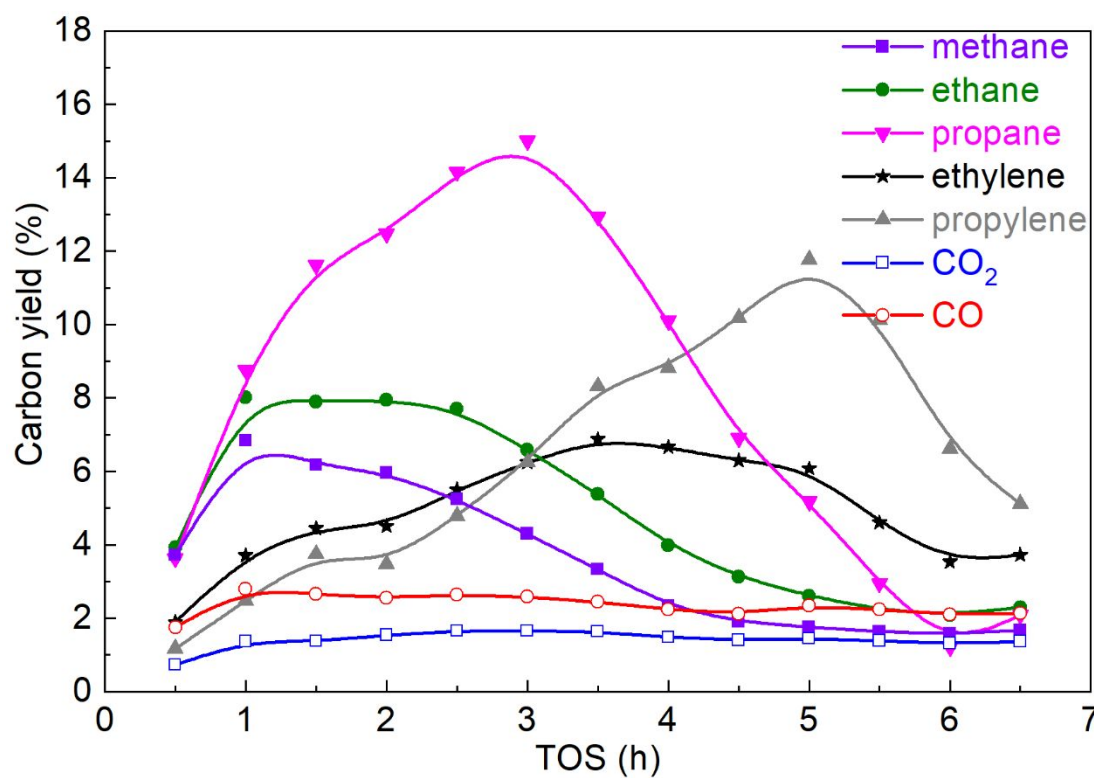

Fig. S3. Carbon yields of gaseous products *versus* TOS over fresh H-ZSM-5/Al<sub>2</sub>O<sub>3</sub> catalysts. (Reaction conditions: catalyst particle size of 1.2 - 1.8 mm, catalyst loading of 10 g, catalyst bed temperature of 550 °C, atmospheric pressure, N<sub>2</sub> flow of 50 ml min<sup>-1</sup>, and WHSV of oleic acid of 1 h<sup>-1</sup>.)

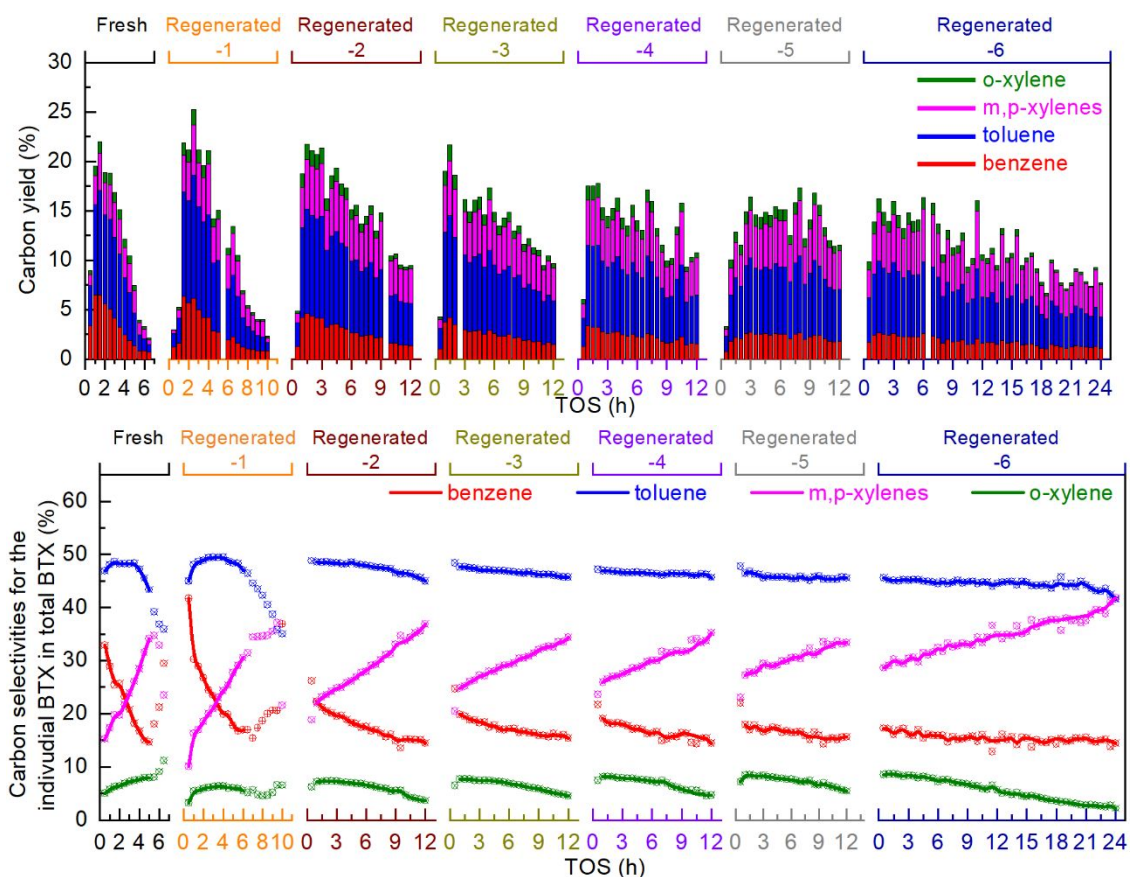

Fig. S4. Carbon yields of aromatics (top) and selectivity's of the individual BTX (bottom) *versus* TOS over fresh and regenerated H-ZSM-5/Al<sub>2</sub>O<sub>3</sub> catalysts.

(Reaction conditions: catalyst particle size of 1.2 - 1.8 mm, catalyst loading of 10 g, catalyst bed temperature of 550 °C, atmospheric pressure, N<sub>2</sub> flow of 50 ml min<sup>-1</sup>, and oleic acid feeding of 10 g h<sup>-1</sup>.)

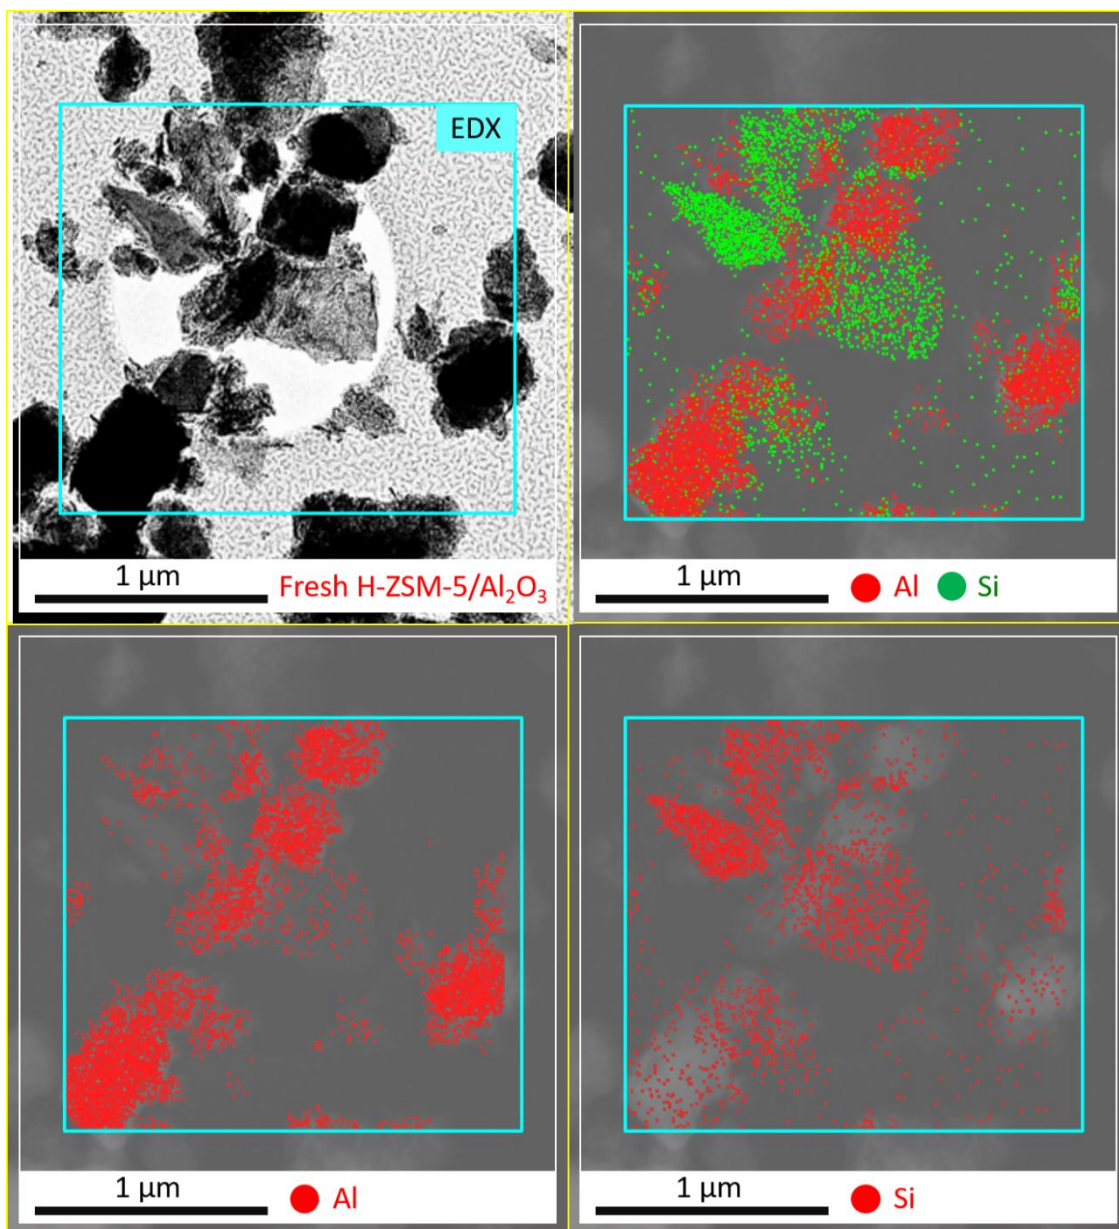

Fig. S5. TEM image and elemental (Al and Si) maps of the fresh H-ZSM-5/Al<sub>2</sub>O<sub>3</sub> catalyst.

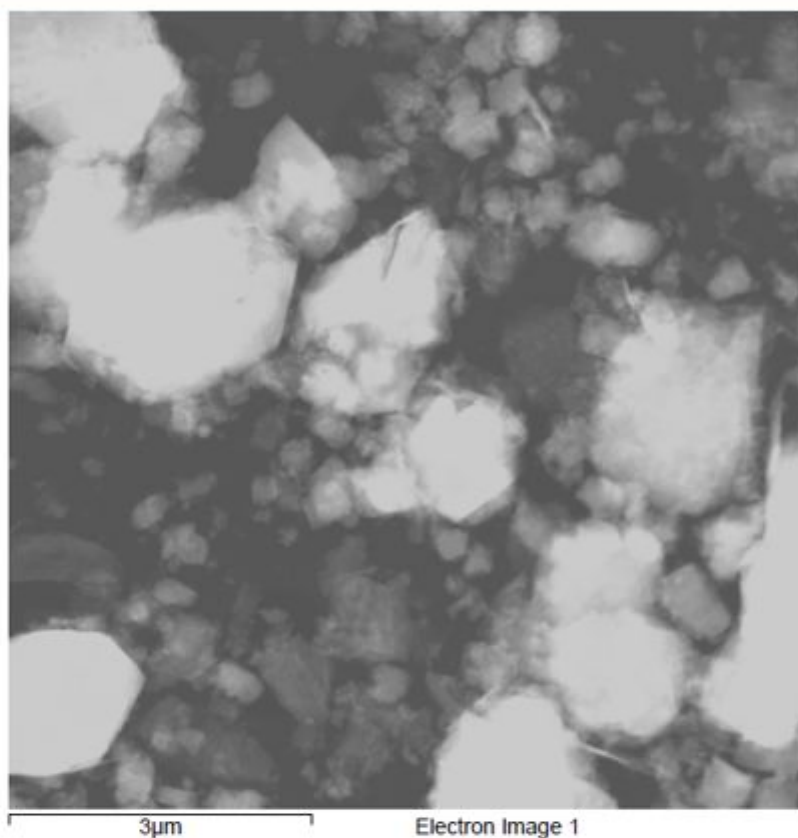

Spectrum processing :  
Peak possibly omitted : 3.690 keV

Quantitation method : Cliff Lorimer thin ratio section.  
Processing option : All elements analyzed  
Number of iterations = 1

Standardless

| Element | Weight% | Atomic% |
|---------|---------|---------|
| C K     | 2.54    | 4.76    |
| O K     | 39.20   | 55.18   |
| Al K    | 20.04   | 16.72   |
| Si K    | 21.89   | 17.55   |
| Cu K    | 16.34   | 5.79    |
| Totals  | 100.00  |         |

Fig. S6. Quantitative EDX analysis of Fresh catalyst.



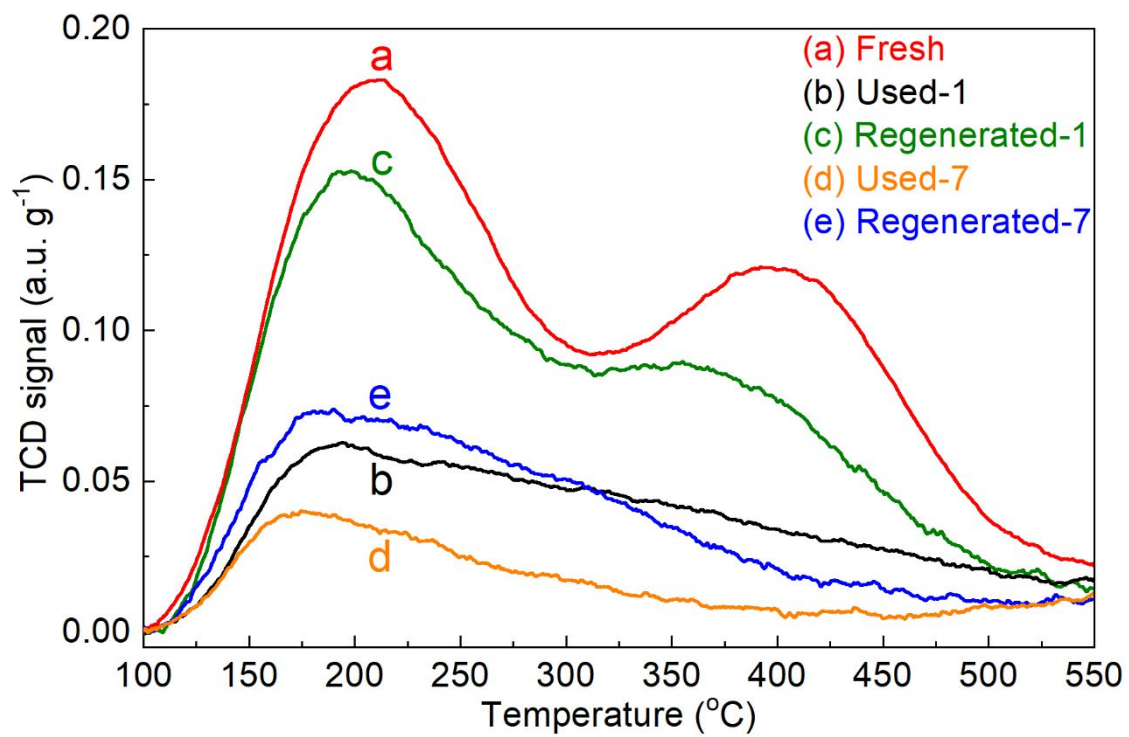

Fig. S7. NH<sub>3</sub>-TPD profiles of fresh, used and regenerated H-ZSM-5/Al<sub>2</sub>O<sub>3</sub> catalysts.

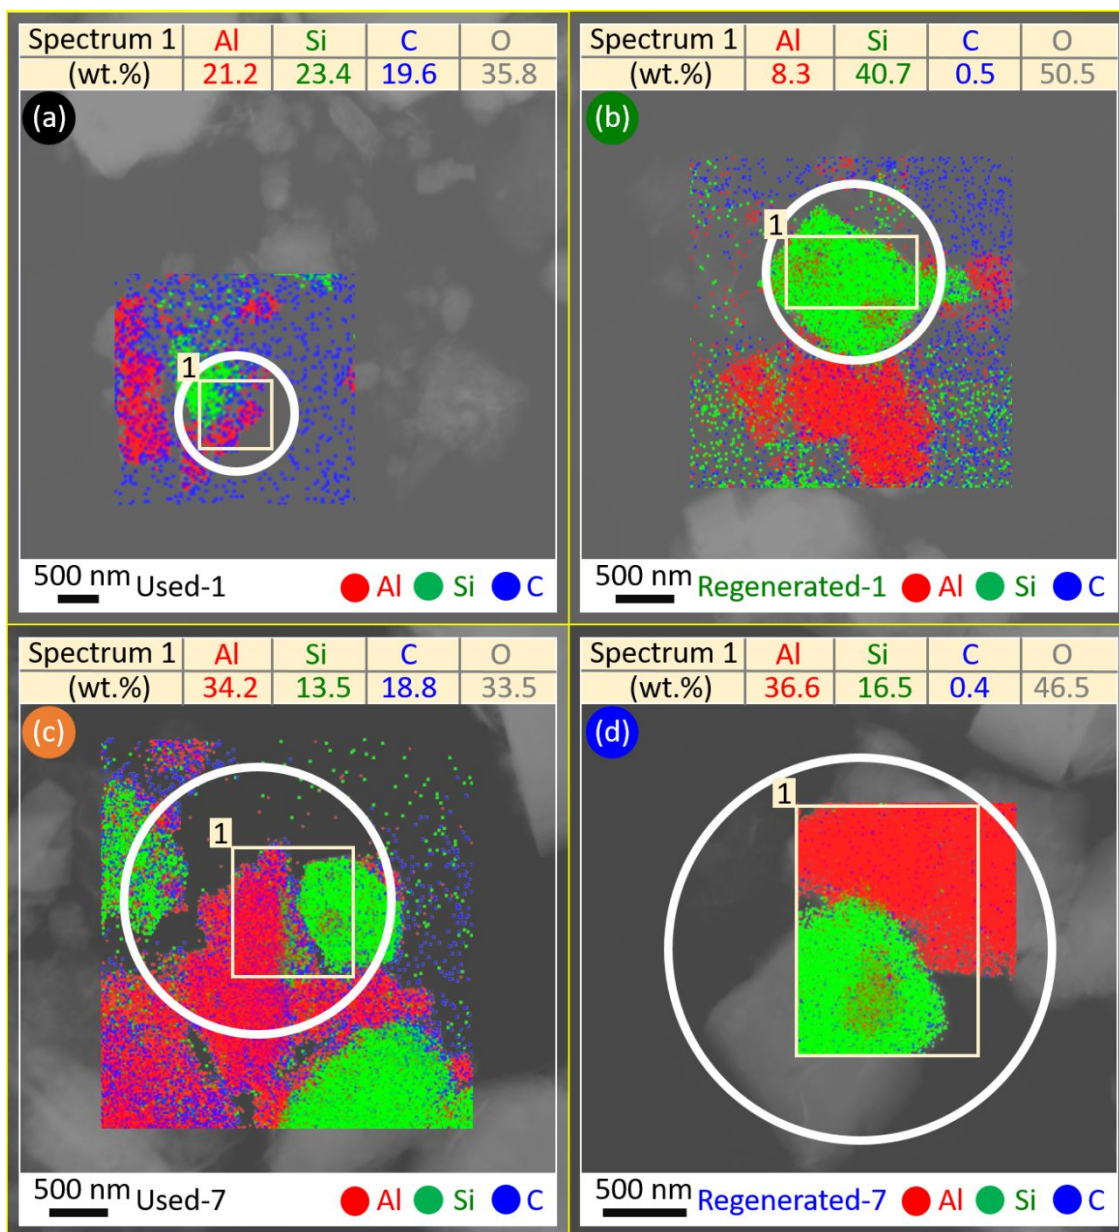

Fig. S8. Elemental (Al, Si and C) maps of the used and regenerated H-ZSM-5/Al<sub>2</sub>O<sub>3</sub> catalysts. (The white circle means the hole on a carbon-coated copper grid used for TEM and EDX analyses.)

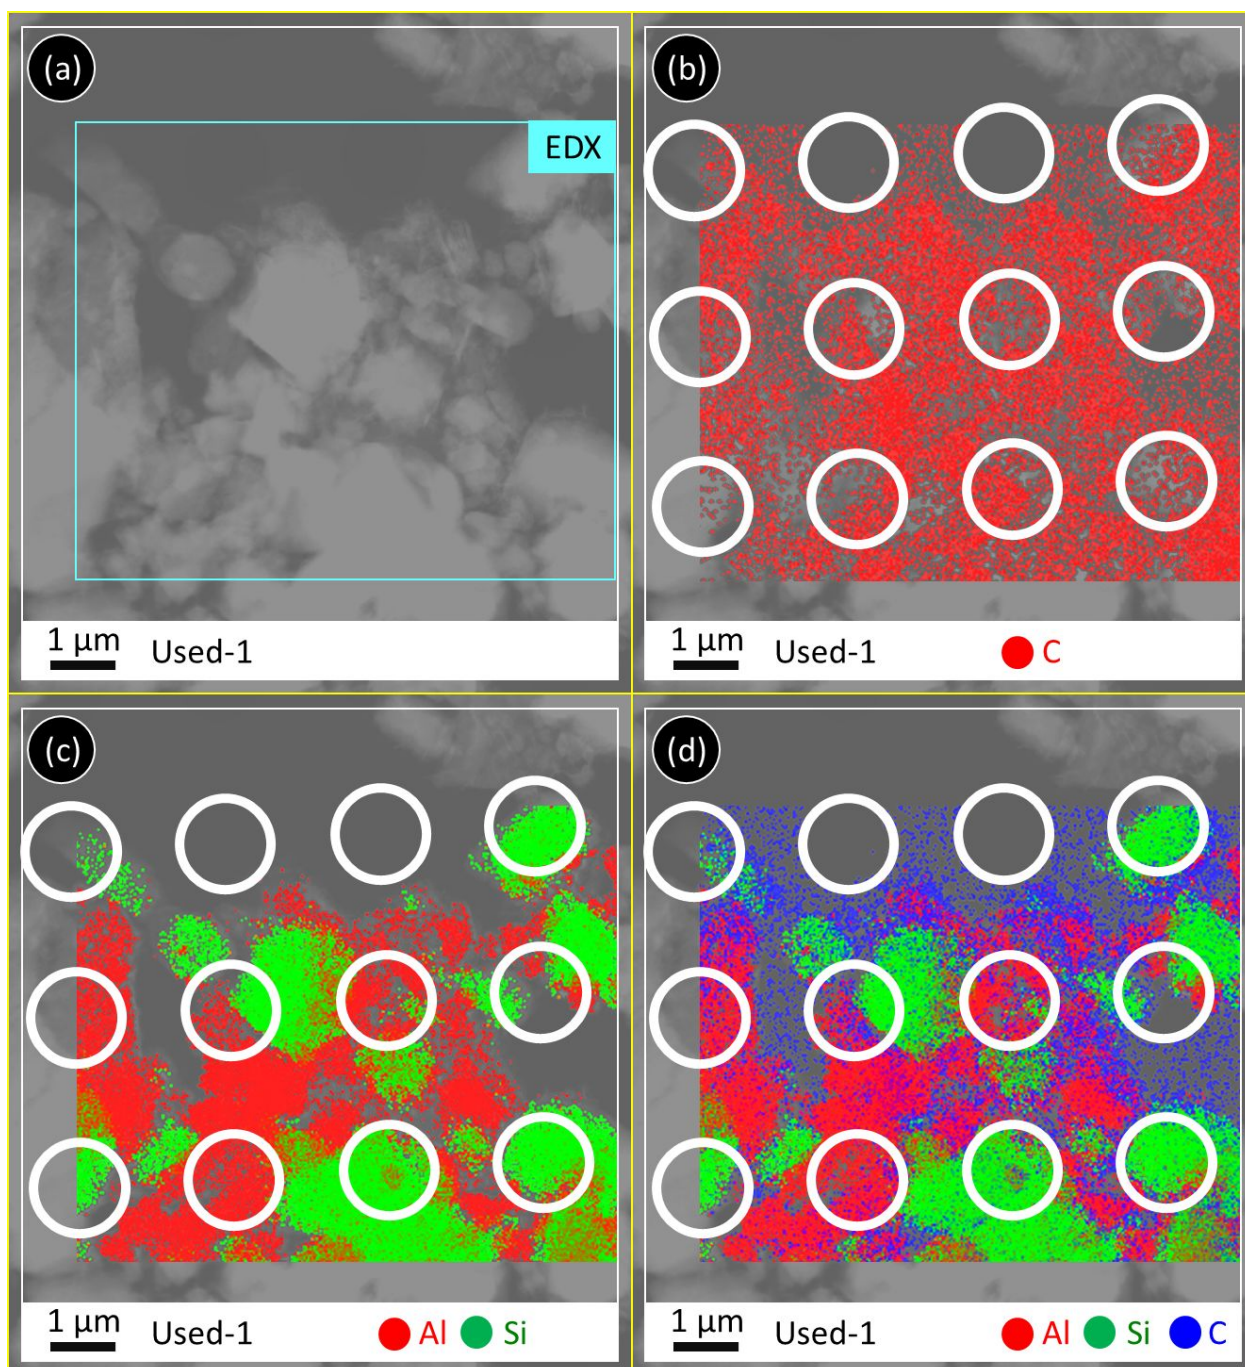

Fig. S9. Elemental (Al, Si and C) maps of Used-1 catalyst.

(The white circle means the holes on a carbon-coated copper grid used for TEM and EDX analyses.)

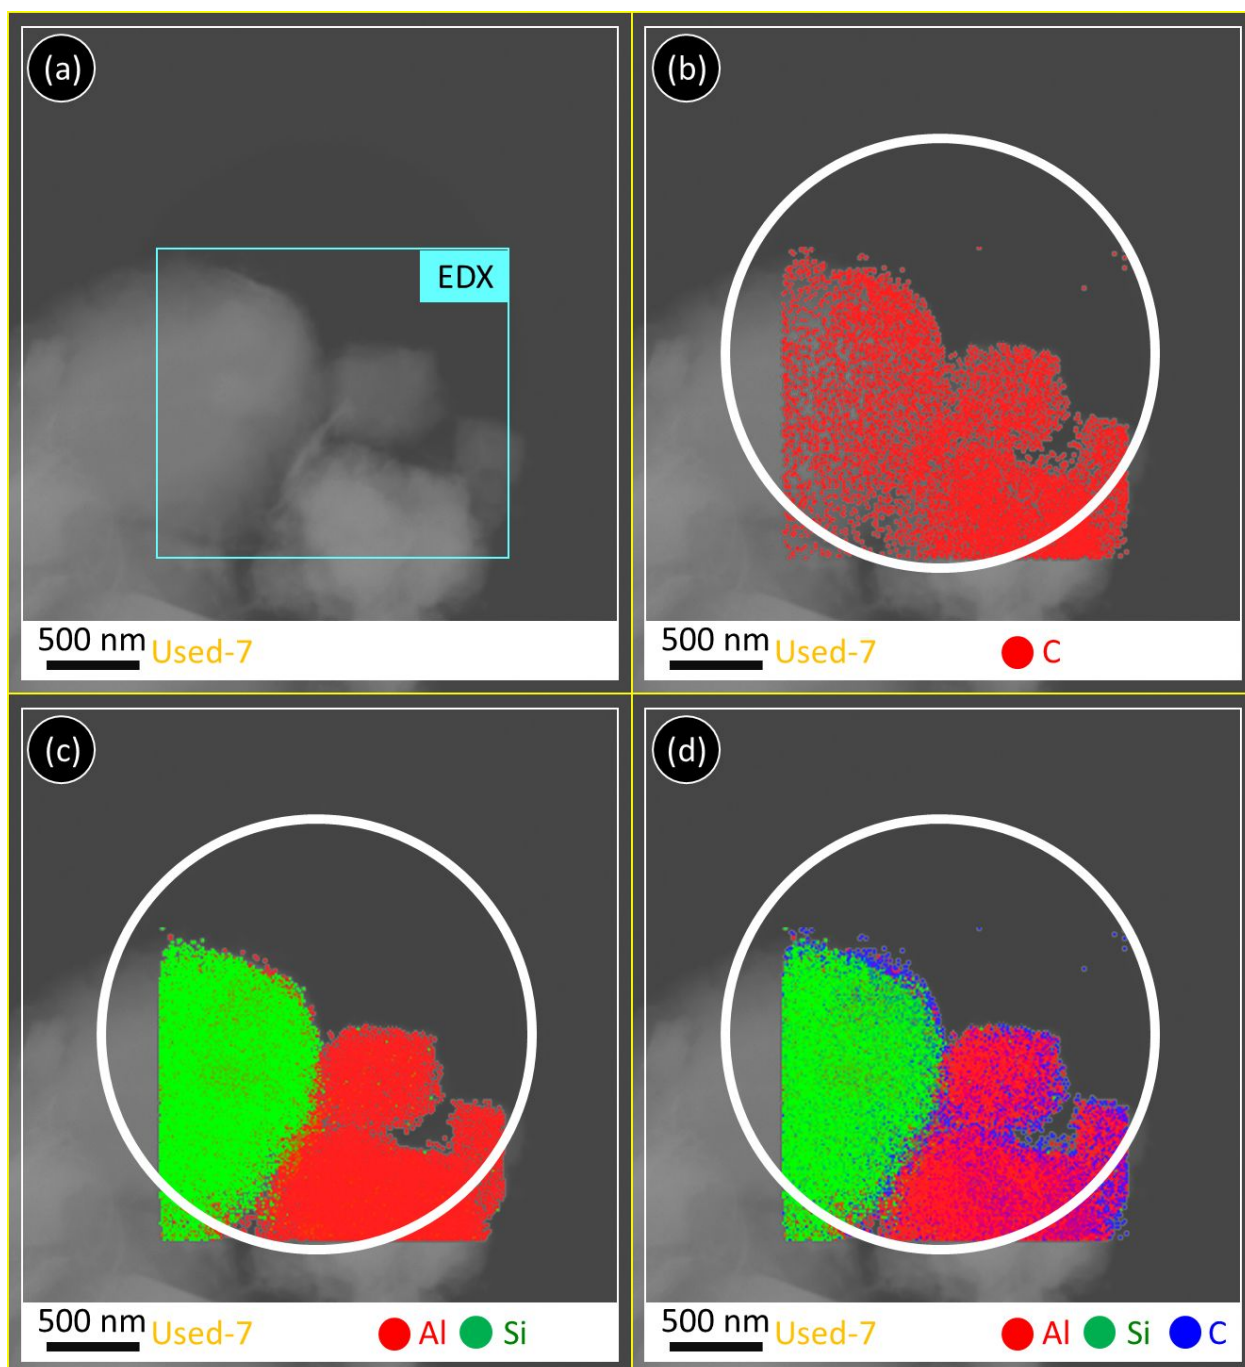

Fig. S10. Elemental (Al, Si and C) maps of Used-7 catalyst.

(The white circle means the hole on a carbon-coated copper grid used for TEM and EDX analyses.)

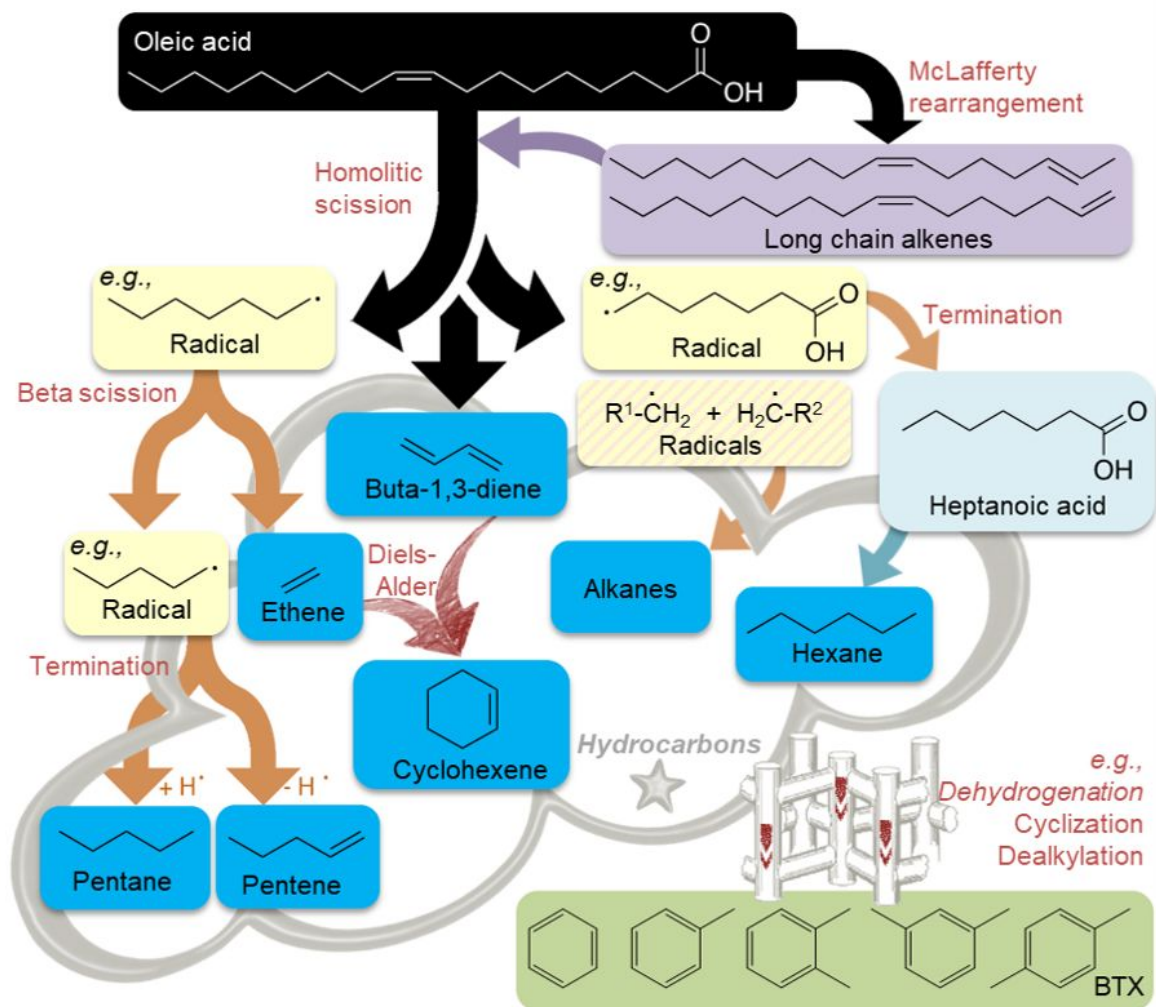

Scheme S1. Proposed reaction pathways for conversion of oleic acid to aromatics. <sup>1-5</sup>

Table S1 GC-MS analysis of the liquid product from thermal pyrolysis of oleic acid

| R.T.    | Library/ID                        | Quality | Area% |
|---------|-----------------------------------|---------|-------|
| 1.488   | Propene                           | 91      | 0.9   |
| 1.5405  | Bicyclo[1.1.0]butane              | 87      | 2.1   |
| 1.6544  | 1-Pentene                         | 90      | 2.5   |
| 1.7377  | 1,3-Pentadiene, (Z)-              | 98      | 0.6   |
| 1.7727  | 1,3-Cyclopentadiene               | 91      | 0.7   |
| 1.8297  | Cyclopentene                      | 91      | 1.5   |
| 1.9567  | 1-Hexene                          | 95      | 3.7   |
| 2.0794  | Cyclopentene, 4-methyl-           | 93      | 0.4   |
| 2.3554  | Isopropenylcyclopropane           | 90      | 0.9   |
| 2.4387  | Benzene                           | 94      | 0.8   |
| 2.5087  | Cyclopentene,3-methylene-         | 81      | 0.6   |
| 2.6051  | Cyclohexene                       | 94      | 1.3   |
| 2.684   | 1-Heptene                         | 95      | 2.5   |
| 2.776   | Heptane                           | 95      | 0.9   |
| 3.0739  | 1,1'-Bicyclopropyl                | 53      | 0.7   |
| 3.1177  | Vinylcyclopentane                 | 94      | 0.5   |
| 3.3368  | 2-Heptyne                         | 91      | 0.8   |
| 3.5514  | Cyclopentane, ethylidene-         | 90      | 0.5   |
| 3.6785  | 1,3,5-Hexatriene, 3-methyl-, (Z)- | 91      | 0.3   |
| 3.753   | 1,3,5-Cycloheptatriene            | 70      | 0.9   |
| 3.8143  | Cyclohexene, 3-methyl-            | 94      | 0.6   |
| 4.0071  | 1,7-Octadiene                     | 90      | 1.6   |
| 4.1735  | 1-Octene                          | 95      | 2.1   |
| 4.3488  | Octane                            | 91      | 0.7   |
| 6.5525  | 1-Nonene                          | 95      | 2.0   |
| 6.8197  | Cyclooctene, (Z)-                 | 91      | 3.4   |
| 8.1034  | Cyclopentene, 1-butyl-            | 95      | 0.4   |
| 9.444   | 1-Decene                          | 87      | 1.2   |
| 11.6389 | Cyclodecene                       | 90      | 0.3   |
| 12.4801 | 1-Nonene                          | 97      | 1.4   |
| 12.8787 | 5-Undecene                        | 94      | 0.8   |
| 13.1241 | 2-Undecene, (E)-                  | 97      | 0.4   |
| 13.4921 | 1,7-Octadiene                     | 80      | 0.8   |
| 15.4329 | 1-Dodecene                        | 98      | 0.8   |
| 16.4011 | 1,2-Nonadiene                     | 78      | 0.6   |
| 18.2499 | 1-Tridecene                       | 98      | 0.6   |
| 20.918  | Cyclooctane, methyl-              | 83      | 4.5   |
| 21.1195 | n-Decanoic acid                   | 98      | 3.5   |
| 22.4995 | Cyclopentene, 1-pentyl-           | 72      | 0.7   |
| 22.8194 | Cyclohexene, 1-octyl-             | 93      | 0.5   |
| 23.4415 | 1-Hexadecene                      | 91      | 0.8   |
| 23.6474 | Pentadecane                       | 97      | 1.9   |

|         |                                        |    |      |
|---------|----------------------------------------|----|------|
| 25.3297 | Benzocyclodecene, tetradecahydro-      | 93 | 1.3  |
| 25.4217 | Spiro[4.5]decane                       | 94 | 0.8  |
| 25.7153 | Dichloroacetic acid, 4-hexadecyl ester | 94 | 0.5  |
| 26.758  | Cyclopentane, 1,1,3-trimethyl-         | 64 | 0.5  |
| 26.8412 | Spiro[4.5]decane                       | 93 | 2.8  |
| 26.9639 | 8-Heptadecene                          | 99 | 7.5  |
| 27.0208 | 8-Heptadecene                          | 99 | 4.6  |
| 27.1084 | E-14-Hexadecenal                       | 99 | 0.8  |
| 27.1873 | Heptadecane                            | 95 | 1.4  |
| 27.7656 | Z,Z-10,12-Hexadecadienal               | 92 | 0.3  |
| 27.9759 | E-7-Octadecene                         | 97 | 0.6  |
| 28.7031 | 1-Nonadecene                           | 95 | 0.2  |
| 29.3822 | n-Hexadecanoic acid                    | 98 | 3.7  |
| 29.9868 | Z,E-2,13-Octadecadien-1-ol             | 98 | 0.7  |
| 30.4599 | Oleic acid                             | 91 | 17.5 |
| 30.8981 | 11-Dodecen-1-ol difluoroacetate        | 91 | 1.0  |
|         | Z-11,13-Dimethyl-11-tetradecen-1-ol    |    |      |
| 31.8575 | acetate                                | 92 | 0.5  |
| 32.4095 | Spiro[4.5]decane                       | 91 | 2.8  |

## References

- (1) Kubatova, A.; Geetla, A.; Casey, J.; Linnen, M. J.; Seames, W. S.; Smoliakova, I. P.; Kozliak, E. I., Cleavage of Carboxylic Acid Moieties in Triacylglycerides During Non-Catalytic Pyrolysis. *J. Am. Oil Chem. Soc.* **2015**, *92*, (5), 755-767. (<https://doi.org/10.1007/s11746-015-2633-4>)
- (2) Leung, A.; Boocock, D. G. B.; Konar, S. K., Pathway for the catalytic conversion of carboxylic-acids to hydrocarbons over activated alumina. *Energy Fuels* **1995**, *9*, (5), 913-920. (<https://doi.org/10.1021/ef00053a026>)
- (3) Rangarajan, S.; Bhan, A.; Daoutidis, P., Rule-Based Generation of Thermochemical Routes to Biomass Conversion. *Ind. Eng. Chem. Res.* **2010**, *49*, (21), 10459-10470. (<https://doi.org/10.1021/ie100546t>)
- (4) Das, J.; Bhat, Y. S.; Halgeri, A. B., Aromatization of C<sub>4</sub>-C<sub>6</sub> hydrocarbons to benzene, toluene and para xylene over pore size controlled ZnO-HZSM-5 zeolite. In *Studies in Surface Science and Catalysis*, Rao, T. S. R. P.; Dhar, G. M., Eds. Elsevier: 1998; Vol. 113, pp 447-453. ([https://doi.org/https://doi.org/10.1016/S0167-2991\(98\)80318-2](https://doi.org/https://doi.org/10.1016/S0167-2991(98)80318-2))
- (5) Asomaning, J.; Mussone, P.; Bressler, D. C., Thermal deoxygenation and pyrolysis of oleic acid. *J. Anal. Appl. Pyrolysis* **2014**, *105*, 1-7. (<https://doi.org/10.1016/j.jaap.2013.09.005>)
